# Supplementary material for: Serum Levels of Acyl-Carnitines along the Continuum from Normal to Alzheimer's Dementia
Source: PubMed Central journal article supplement (PMC4873244; doi:10.1371/journal.pone.0155694), 2016-05-19
Supplement: pone.0155694.s003.pdf [file pone.0155694.s003.pdf]

**S1 Table. Tandem Mass Spectrometry variability (CV%) of free L-carnitine and acyl-carnitines estimated on three different concentrations ( $\mu\text{mol/L}$ ) of quality controls.**

| Marker          | Level-1 |      | Level-2 |      | Level-3 |      |
|-----------------|---------|------|---------|------|---------|------|
|                 | mean    | CV%  | mean    | CV%  | mean    | CV%  |
| <b>C0</b>       | 19.199  | 9.6  | 42.538  | 9.8  | 65.855  | 8.8  |
| <b>C2</b>       | 9.424   | 16.5 | 14.178  | 10.6 | 39.035  | 10.3 |
| <b>C3</b>       | 0.907   | 16.9 | 1.231   | 7.4  | 12.515  | 10.8 |
| <b>C3DC</b>     | 0.059   | 13.6 | 0.079   | 14.8 | 2.002   | 10.7 |
| <b>C4:0</b>     | 0.109   | 8.2  | 0.155   | 12.3 | 4.476   | 11.5 |
| <b>C4DC</b>     | 0.500   | 14.3 | 0.590   | 11.5 | 2.037   | 15.4 |
| <b>C4OH</b>     | 0.057   | 12.3 | 0.076   | 13.0 | 1.882   | 9.2  |
| <b>C5:0</b>     | 0.067   | 10.0 | 0.102   | 15.5 | 2.576   | 9.1  |
| <b>C5:1</b>     | 0.016   | 32.0 | 0.021   | 28.1 | 0.020   | 20.2 |
| <b>C5DC</b>     | 0.015   | 15.6 | 0.029   | 22.4 | 0.735   | 9.4  |
| <b>C5OH</b>     | 0.459   | 12.7 | 0.529   | 9.9  | 1.847   | 11.0 |
| <b>C6:0</b>     | 0.020   | 10.8 | 0.029   | 15.2 | 1.885   | 10.2 |
| <b>C8:0</b>     | 0.023   | 13.3 | 0.066   | 15.5 | 2.592   | 7.0  |
| <b>C10:0</b>    | 0.035   | 34.0 | 0.091   | 18.7 | 2.337   | 12.2 |
| <b>C10:1</b>    | 0.027   | 52.1 | 0.079   | 21.3 | 0.032   | 42.7 |
| <b>C12:0</b>    | 0.017   | 25.0 | 0.034   | 15.2 | 1.619   | 9.0  |
| <b>C12:1</b>    | 0.009   | 53.2 | 0.024   | 21.3 | 0.011   | 26.0 |
| <b>C12-OH</b>   | 0.024   | 22.2 | 0.028   | 23.3 | 0.022   | 18.4 |
| <b>C14:0</b>    | 0.058   | 9.3  | 0.085   | 16.2 | 2.834   | 7.7  |
| <b>C14:1</b>    | 0.023   | 20.7 | 0.045   | 15.8 | 0.028   | 14.4 |
| <b>C14:2</b>    | 0.011   | 23.7 | 0.023   | 17.9 | 0.013   | 20.4 |
| <b>C14-OH</b>   | 0.012   | 52.4 | 0.019   | 55.7 | 0.022   | 28.0 |
| <b>C16:0</b>    | 0.643   | 15.8 | 0.751   | 7.7  | 9.441   | 5.2  |
| <b>C16:1</b>    | 0.034   | 32.6 | 0.050   | 12.1 | 0.038   | 27.0 |
| <b>C16-OH</b>   | 0.020   | 9.6  | 0.038   | 16.4 | 0.667   | 12.2 |
| <b>C16:1 OH</b> | 0.038   | 10.1 | 0.068   | 15.4 | 0.054   | 9.0  |

---

|                 |       |      |       |      |       |      |
|-----------------|-------|------|-------|------|-------|------|
| <b>C18:0</b>    | 0.591 | 10.6 | 0.718 | 17.5 | 5.060 | 15.1 |
| <b>C18:1</b>    | 0.869 | 21.6 | 1.126 | 17.1 | 1.002 | 18.6 |
| <b>C18:2</b>    | 0.249 | 25.1 | 0.336 | 12.1 | 0.289 | 22.4 |
| <b>C18-OH</b>   | 0.011 | 21.6 | 0.020 | 20.1 | 0.986 | 22.1 |
| <b>C18:1-OH</b> | 0.018 | 18.0 | 0.028 | 18.2 | 0.021 | 16.5 |
| <b>C18:2 OH</b> | 0.023 | 22.5 | 0.034 | 25.2 | 0.024 | 20.8 |

---
